# Supplementary material for: In Situ exsolved Au nanoparticles from perovskite oxide for efficient epoxidation of styrene
Source: Royal Society of Chemistry journal article supplement (doi:10.1039/d1ta01203g), 2021-01-01
Supplement: d1ta01203g1.pdf [file d1ta01203g1.pdf]

## Supporting Information

# In Situ Exsolved Au Nanoparticles from Perovskite Oxide for Efficient Epoxidation of Styrene

Yang Gao,<sup>‡</sup> Chen Xing,<sup>‡</sup> Shuqi Hu, and Shiguo Zhang\*

College of Materials Science and Engineering, Hunan province key laboratory for advanced carbon materials and applied technology, Hunan University, Changsha, 410082, P. R. China.

\*Corresponding author: zhangsg@hnu.edu.cn.

<sup>‡</sup> These authors contributed equally to this work.

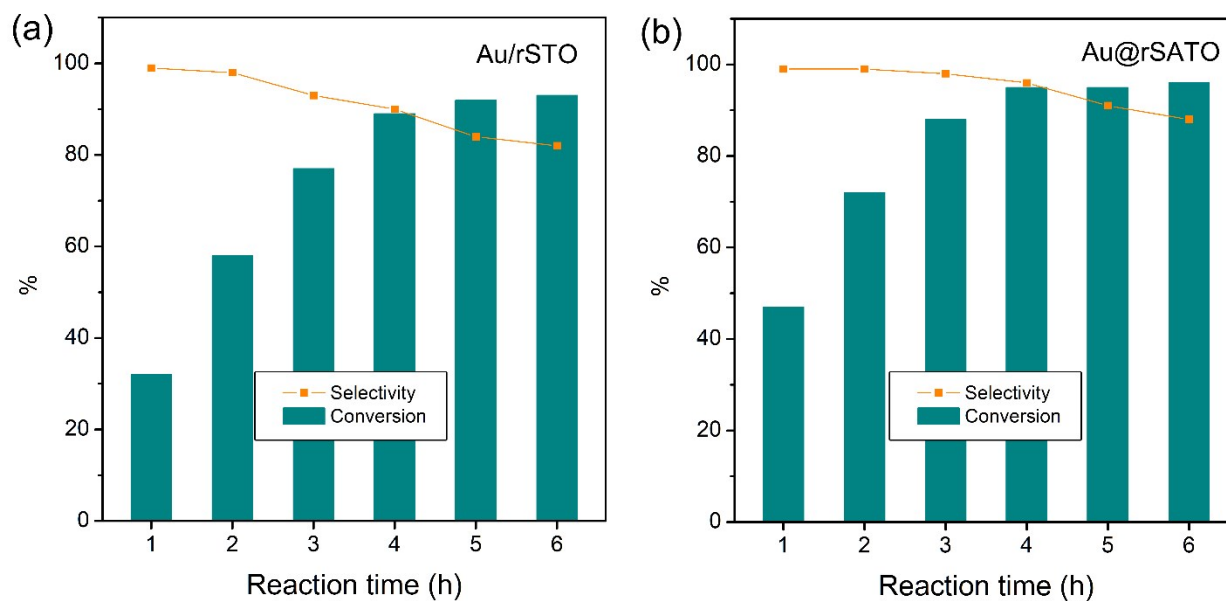

**Figure S1.** Conversion and selectivity of the *ex situ* deposited Au/rSTO and *in situ* exsolved Au@rSATO versus reaction time in 6h.

**Table S1.** Catalytic activity of supported AuNPs for styrene epoxidation.

| Catalyst                          | Au wt. % | Oxidant                       | Conversion % | Selectivity % | Ref.      |
|-----------------------------------|----------|-------------------------------|--------------|---------------|-----------|
| Au/STO                            | 0.53     | H <sub>2</sub> O <sub>2</sub> | 65.2         | 91.7          | This work |
| Au/rSTO                           | 0.53     | H <sub>2</sub> O <sub>2</sub> | 88.5         | 90.1          | This work |
| SATO                              | 0.53     | H <sub>2</sub> O <sub>2</sub> | 21.6         | 96.4          | This work |
| Au@rSATO                          | 0.53     | H <sub>2</sub> O <sub>2</sub> | 95.0         | 96.3          | This work |
| Au/MgO                            | 7.5      | TBHP                          | 62.6         | 54.3          | [1]       |
| Au/Al <sub>2</sub> O <sub>3</sub> | 6.36     | TBHP                          | 44           | 28            | [2]       |
| Au/TiO <sub>2</sub>               | 6.0      | TBHP                          | 61           | 53            | [3]       |
| Au/Al <sub>2</sub> O <sub>3</sub> | 2.0      | TBHP                          | 84.3         | 69.0          | [4]       |
| Au/LDH                            | 0.66     | TBHP                          | 67.4         | 73.5          | [5]       |
| Au/BaTNT                          | 1        | TBHP                          | 60.5         | 80.1          | [6]       |
| Au/Si                             | 4        | TBHP                          | 98.5         | 82.8          | [7]       |
| Au/TS-1                           | 1        | H <sub>2</sub> O <sub>2</sub> | 92.7         | 90.4          | [8]       |
| Au-2S-IL                          | 4.5      | H <sub>2</sub> O <sub>2</sub> | 60.4         | 92.9          | [9]       |

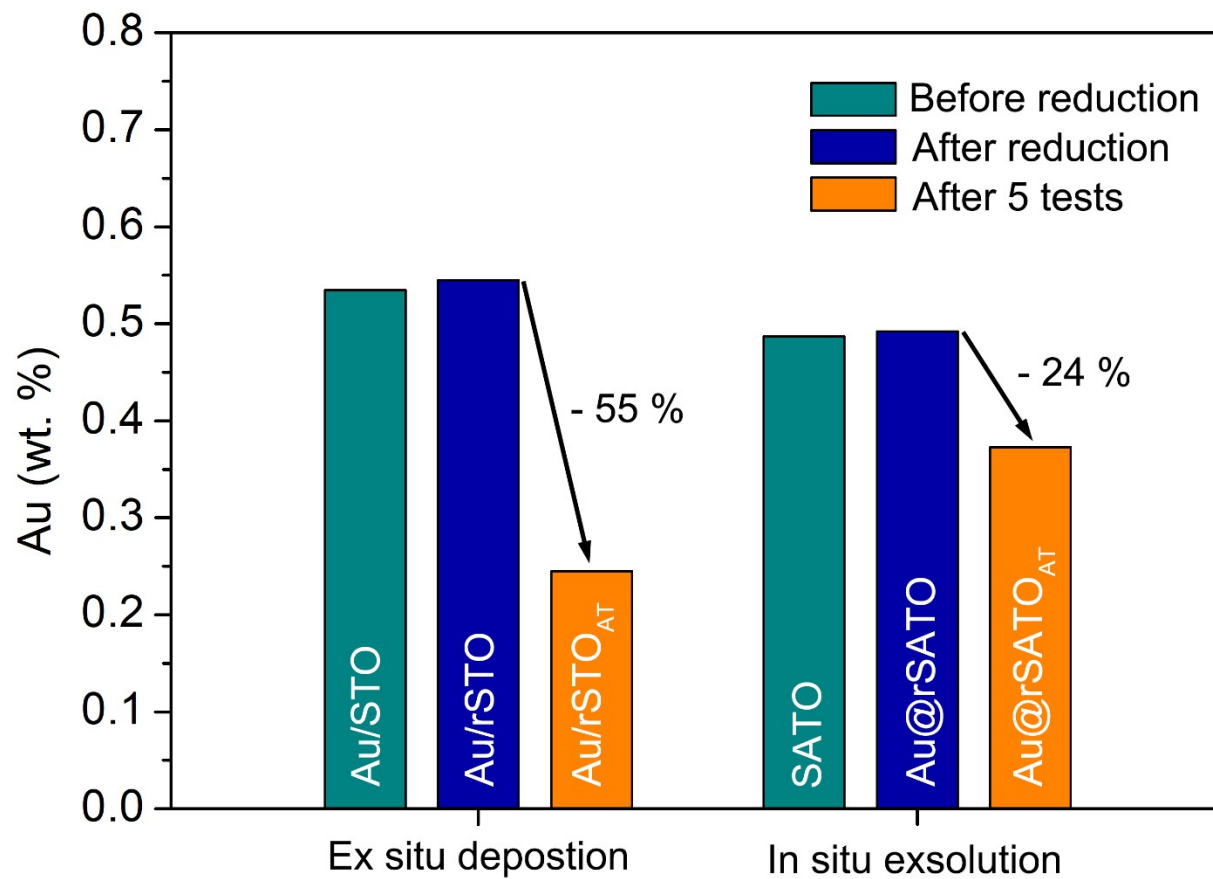

**Figure S2.** Weight ratio of Au in the as-prepared catalysts before and after catalysis obtained with ICP-OES.

**Table S2.** Elemental compositions of the as-prepared catalysts based on XPS analysis. The values show the relative atomic ratios of Sr and Au compared to Ti.

| Elemental | Sr/Ti | Au/Ti  |
|-----------|-------|--------|
| Au@rSATO  | 0.851 | 0.0055 |
| SATO      | 0.806 | 0.0048 |
| Au/rSTO   | 0.948 | 0.0050 |
| Au/STO    | 0.915 | 0.0049 |
| rSTO      | 0.953 | /      |
| STO       | 0.915 | /      |

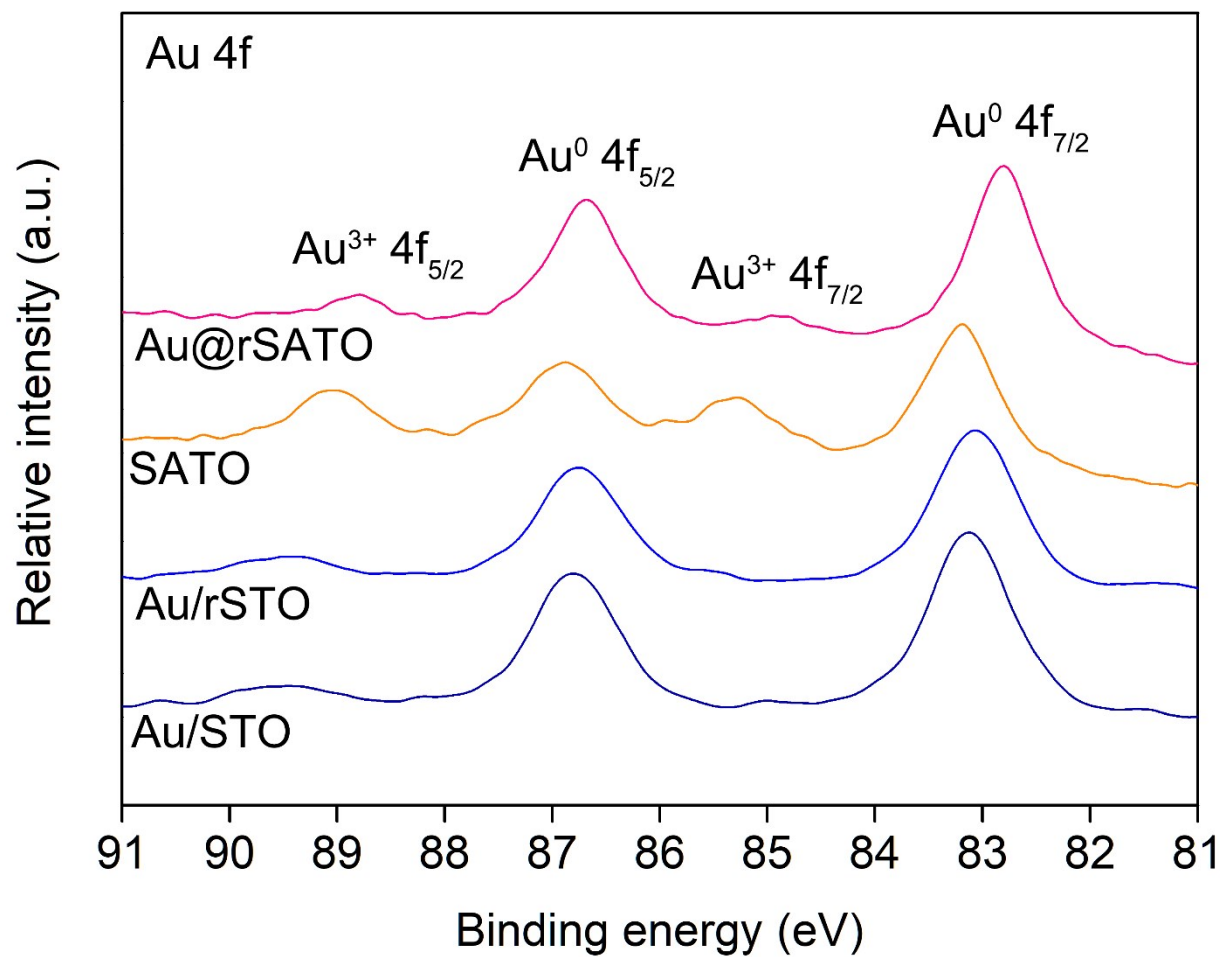

**Figure S3.** High-resolution Au spectra of the Au-containing samples.

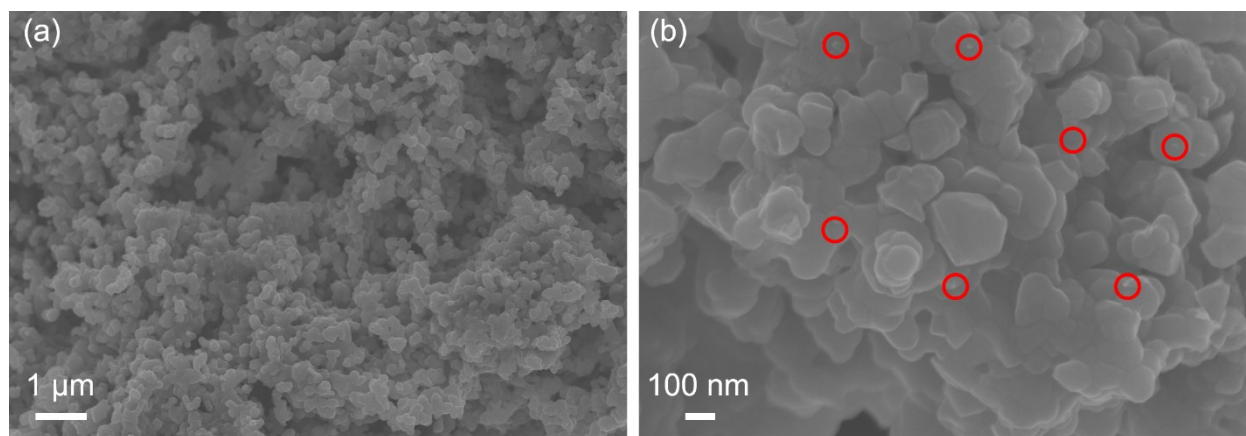

**Figure S4.** SEM images of Au@rSATO with different magnifications. The red circles highlight some of the exsolved nanoparticles.

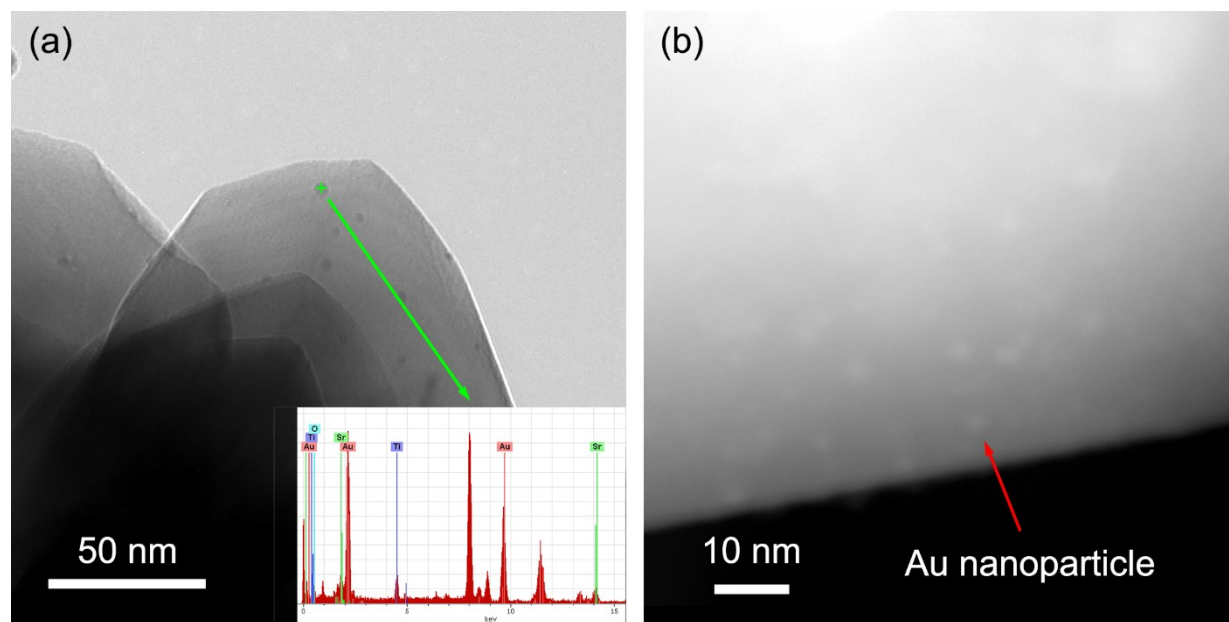

**Figure S5.** (a) EDX analysis of a selected Au nanoparticle for Au@rSATO. (b) HAADF-STEM image of Au@rSATO. Bright dots represent for the AuNPs.



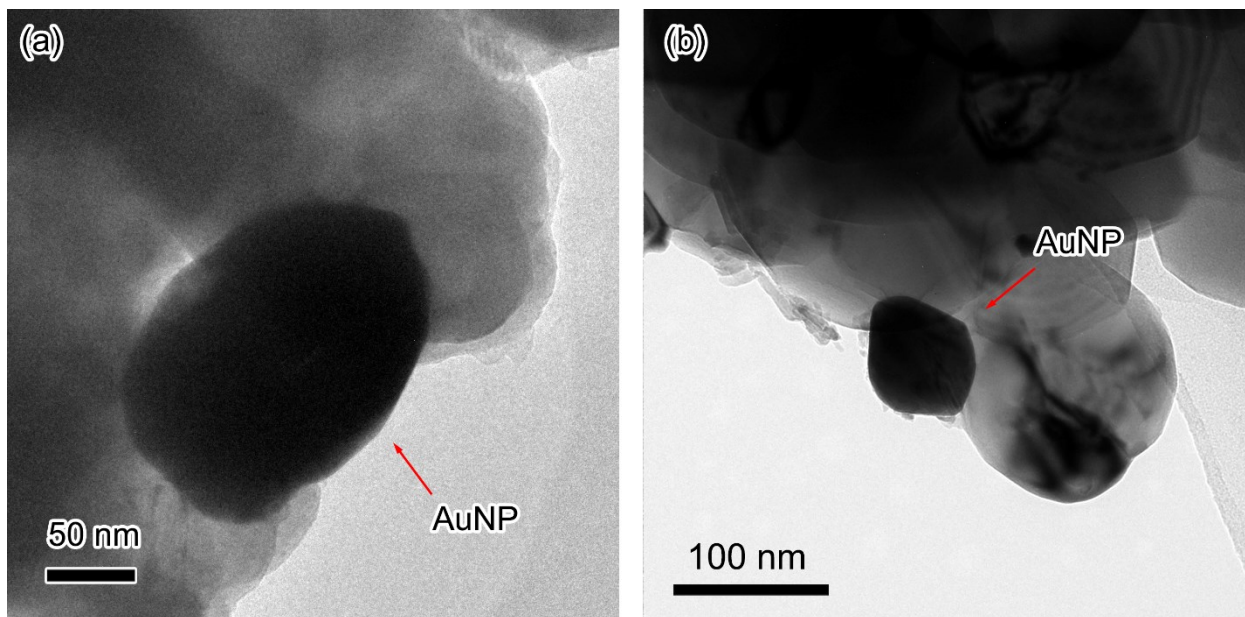

**Figure S6.** TEM images of the AuNPs in Au/rSTO.

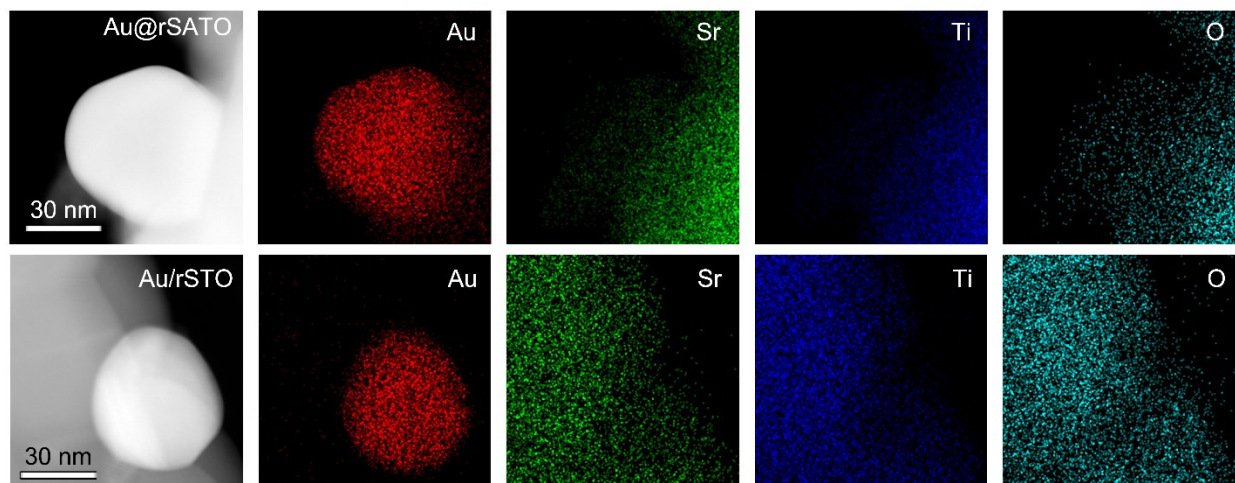

**Figure S7.** HAADF image and the corresponding EDX mappings of selected AuNPs for Au@rSATO (top) and Au/rSTO (bottom).

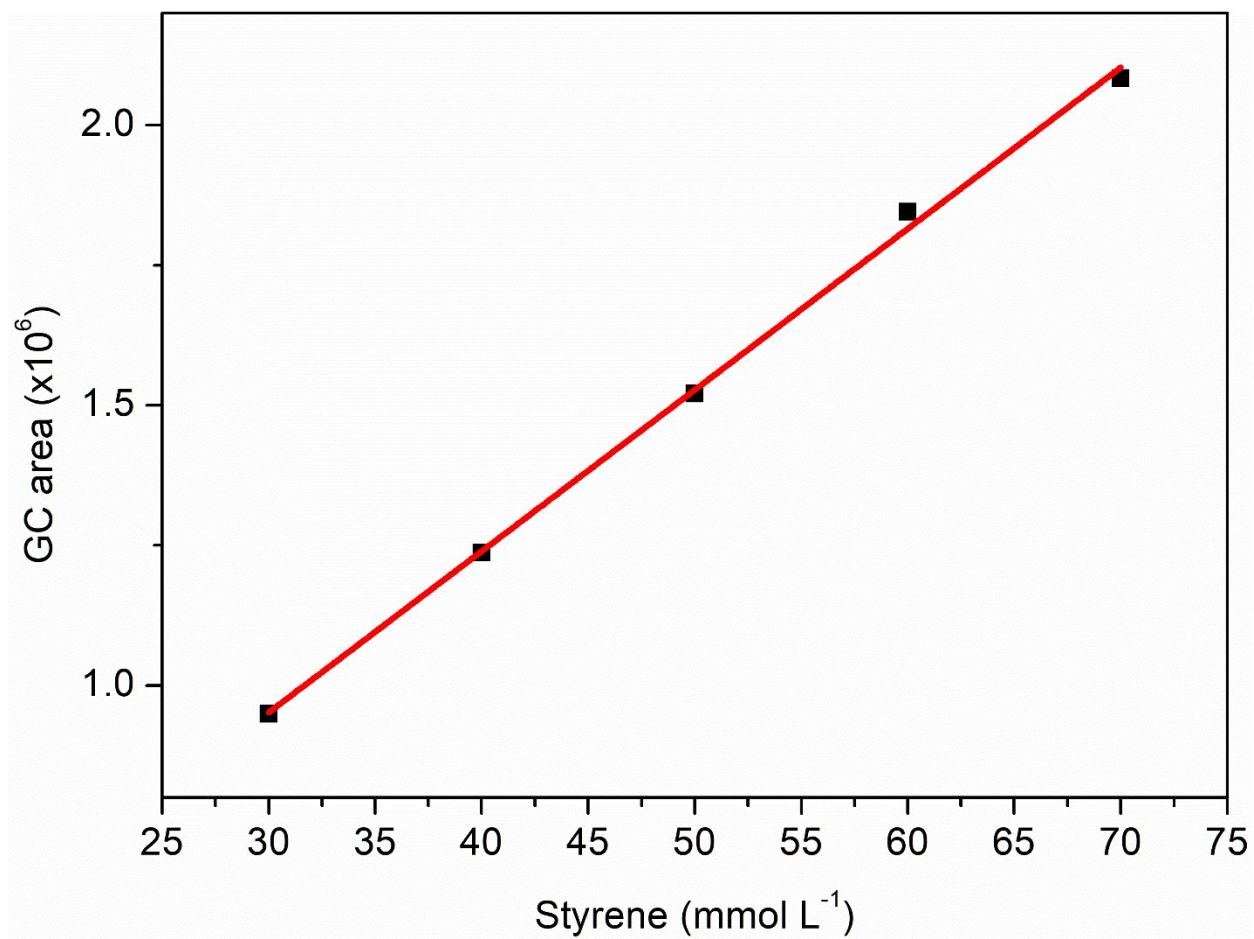

**Figure S8.** Calibration of the GC-area with standard styrene solutions of different concentrations (1  $\mu\text{L}$  styrene solution with a split ratio of 1:50).

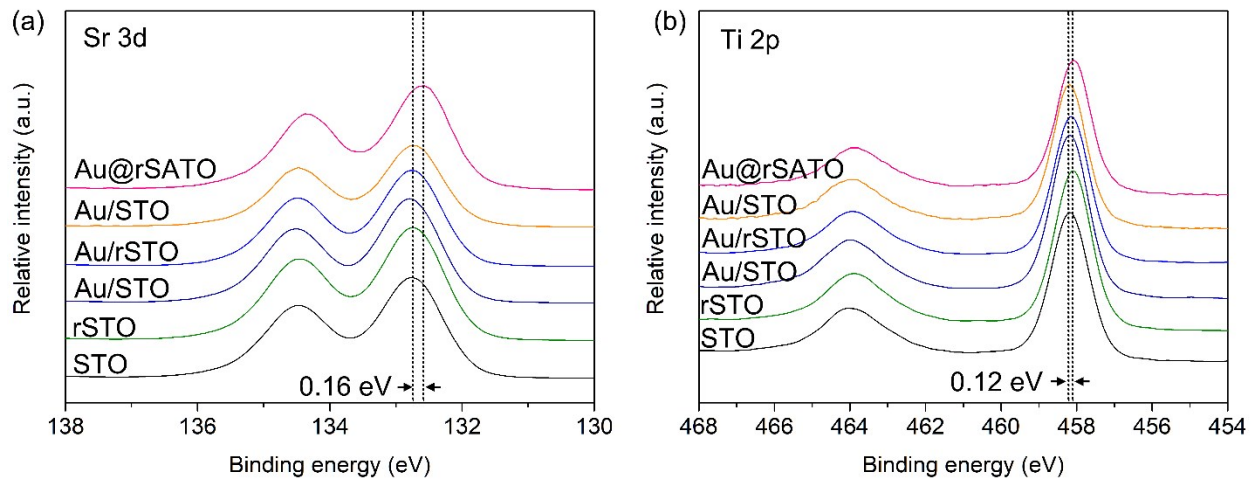

**Figure S9.** High-resolution Sr 3d and Ti 2p spectra of the as-prepared catalysts.

(a)

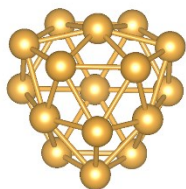

(b)

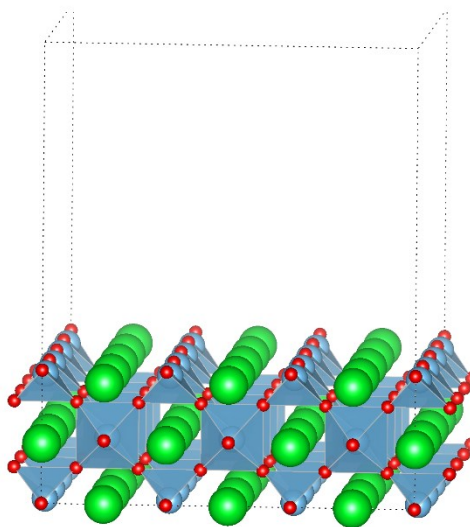

**Figure S10.** Relaxed slab models for (a)  $\text{Au}_{16}$  cluster, and (b)  $\text{SrTiO}_3$  (110) surface with the bottom two layers are fixed.

**Table S3.1.** Coordinates and Bader charge of the Au atoms for Figure 6(f) in the main text.

| <b>Atom number</b> | <b>X</b> | <b>Y</b> | <b>Z</b> | <b>Charge (e<sup>-</sup>)</b> |
|--------------------|----------|----------|----------|-------------------------------|
| <b>1</b>           | 13.707   | 6.905    | 7.912    | 0.498443                      |
| <b>2</b>           | 11.901   | 5.399    | 9.37     | 0.130842                      |
| <b>3</b>           | 7.672    | 5.399    | 9.352    | 0.129377                      |
| <b>4</b>           | 5.962    | 3.833    | 7.761    | 0.694315                      |
| <b>5</b>           | 7.704    | 8.282    | 9.51     | 0.070997                      |
| <b>6</b>           | 5.873    | 6.924    | 7.903    | 0.498174                      |
| <b>7</b>           | 13.607   | 3.831    | 7.761    | 0.70034                       |
| <b>8</b>           | 9.758    | 9.928    | 7.842    | 0.60733                       |
| <b>9</b>           | 9.783    | 6.636    | 10.566   | 0.028279                      |
| <b>10</b>          | 13.599   | 9.744    | 7.82     | 0.593205                      |
| <b>11</b>          | 9.779    | 6.997    | 7.76     | 0.484984                      |
| <b>12</b>          | 11.855   | 8.276    | 9.484    | 0.066647                      |
| <b>13</b>          | 9.788    | 9.575    | 10.645   | 0.182214                      |
| <b>14</b>          | 5.99     | 9.761    | 7.828    | 0.600224                      |
| <b>15</b>          | 9.793    | 4.148    | 7.955    | 0.439763                      |
| <b>16</b>          | 9.791    | 1.412    | 7.767    | 0.638329                      |

**Table S3.2.** Coordinates and Bader charge of the Au atoms for Figure 6(g) in the main text.

| <b>Atom number</b> | <b>X</b> | <b>Y</b> | <b>Z</b> | <b>Charge (e<sup>-</sup>)</b> |
|--------------------|----------|----------|----------|-------------------------------|
| <b>1</b>           | 9.523    | 9.159    | 7.638    | 0.035284                      |
| <b>2</b>           | 6.467    | 9.099    | 12.194   | -0.02098                      |
| <b>3</b>           | 8.757    | 10.498   | 12.092   | 0.019555                      |
| <b>4</b>           | 5.635    | 7.692    | 9.953    | 0.013918                      |
| <b>5</b>           | 7.684    | 5.828    | 9.726    | -0.09355                      |
| <b>6</b>           | 8.821    | 5.02     | 12.176   | 0.021363                      |
| <b>7</b>           | 7.648    | 9.661    | 9.686    | -0.09514                      |
| <b>8</b>           | 10.35    | 5.048    | 9.873    | 0.021877                      |
| <b>9</b>           | 7.142    | 7.757    | 7.729    | 0.01242                       |
| <b>10</b>          | 11.182   | 6.461    | 12.11    | -0.02293                      |
| <b>11</b>          | 9.558    | 6.395    | 7.689    | 0.00954                       |
| <b>12</b>          | 10.323   | 10.529   | 9.812    | 0.02386                       |
| <b>13</b>          | 10.983   | 7.794    | 9.623    | -0.0949                       |
| <b>14</b>          | 11.182   | 9.145    | 12.046   | 0.048927                      |
| <b>15</b>          | 6.473    | 6.337    | 12.216   | 0.054393                      |
| <b>16</b>          | 8.829    | 7.765    | 12.802   | -0.08855                      |

**Table S3.3.** Coordinates and Bader charge of the Au atoms for Figure 6(h) in the main text.

| <b>Atom number</b> | <b>X</b> | <b>Y</b> | <b>Z</b> | <b>Charge (e<sup>-</sup>)</b> |
|--------------------|----------|----------|----------|-------------------------------|
| <b>1</b>           | 5.513    | 6.809    | 12.307   | 0.037373                      |
| <b>2</b>           | 10.226   | 9.615    | 12.35    | 0.079694                      |
| <b>3</b>           | 7.848    | 8.225    | 12.999   | -0.032404                     |
| <b>4</b>           | 8.754    | 6.942    | 7.892    | 0.33344                       |
| <b>5</b>           | 10.223   | 6.931    | 12.367   | 0.05145                       |
| <b>6</b>           | 10.111   | 8.306    | 9.899    | -0.017959                     |
| <b>7</b>           | 9.446    | 11.038   | 10.112   | 0.132677                      |
| <b>8</b>           | 8.722    | 9.707    | 7.888    | 0.27777                       |
| <b>9</b>           | 7.801    | 10.97    | 12.335   | 0.08216                       |
| <b>10</b>          | 5.509    | 9.571    | 12.333   | 0.086698                      |
| <b>11</b>          | 6.81     | 6.342    | 9.852    | 0.055361                      |
| <b>12</b>          | 4.755    | 8.204    | 10.04    | 0.129941                      |
| <b>13</b>          | 6.776    | 10.175   | 9.877    | 0.058941                      |
| <b>14</b>          | 7.861    | 5.49     | 12.326   | 0.079822                      |
| <b>15</b>          | 6.338    | 8.306    | 7.872    | 0.570837                      |
| <b>16</b>          | 9.469    | 5.557    | 10.079   | 0.132963                      |



## References

- [1] N. Patil, B. Uphade, P. Jana, S. Bhargava, V. Choudhary, Epoxidation of styrene by anhydrous t-butyl hydroperoxide over reusable gold supported on MgO and other alkaline earth oxides, *J. Catal.*, 223 (2004) 236-239.
- [2] N. Patil, R. Jha, B. Uphade, S. Bhargava, V. Choudhary, Epoxidation of styrene by anhydrous t-butyl hydroperoxide over gold supported on Al<sub>2</sub>O<sub>3</sub>, Ga<sub>2</sub>O<sub>3</sub>, In<sub>2</sub>O<sub>3</sub> and Ti<sub>2</sub>O<sub>3</sub>, *Appl. Catal., A*, 275 (2004) 87-93.
- [3] N. Patil, B. Uphade, D. McCulloh, S. Bhargava, V. Choudhary, Styrene epoxidation over gold supported on different transition metal oxides prepared by homogeneous deposition–precipitation, *Catal. Commun.*, 5 (2004) 681-685.
- [4] D. Yin, L. Qin, J. Liu, C. Li, Y. Jin, Gold nanoparticles deposited on mesoporous alumina for epoxidation of styrene: Effects of the surface basicity of the supports, *J. Mol. Catal. A: Chem.*, 240 (2005) 40-48.
- [5] F. Zhang, X. Zhao, C. Feng, B. Li, T. Chen, W. Lu, X. Lei, S. Xu, Crystal-face-selective supporting of gold nanoparticles on layered double hydroxide as efficient catalyst for epoxidation of styrene, *ACS Catal.*, 1 (2011) 232-237.
- [6] D. Nepak, D. Srinivas, Spectroscopy and catalytic activity study of gold supported on barium titanate nanotubes for styrene epoxidation, *Appl. Catal., A*, 523 (2016) 61-72.
- [7] J. Liu, F. Wang, S. Qi, Z. Gu, G. Wu, Highly selective epoxidation of styrene over gold–silica catalysts via one-pot synthesis: synthesis, characterization, and catalytic application, *New J. Chem.*, 37 (2013) 769-774.
- [8] J. Huang, C. Liu, D. Sun, Y. Hong, M. Du, T. Odoom-Wubah, W. Fang, Q. Li, Biosynthesized gold nanoparticles supported over TS-1 toward efficient catalyst for epoxidation of styrene, *Chem. Eng. J.*, 235 (2014) 215-223.
- [9] Y. Jin, D. Zhuang, N. Yu, H. Zhao, Y. Ding, L. Qin, J. Liu, D. Yin, H. Qiu, Z. Fu, Epoxidation of styrene over gold nanoparticles supported on organic–inorganic hybrid mesoporous silicas with aqueous hydrogen peroxide, *Microporous Mesoporous Mater.*, 126 (2009) 159-165.
